# Supplementary material
Source: Springer Nature journal article supplement (https://www.springermedizin.de/resource/supplementary/12874_2008_325_MOESM2_ESM.pdf/9434404)

**Trace of x.1**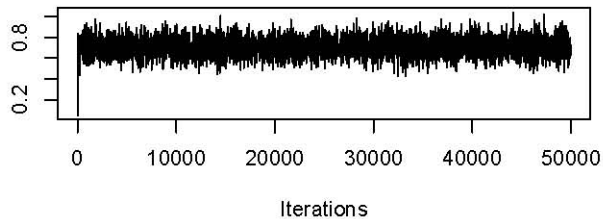**Density of x.1**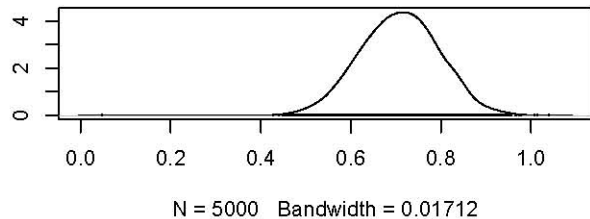**Trace of x.2**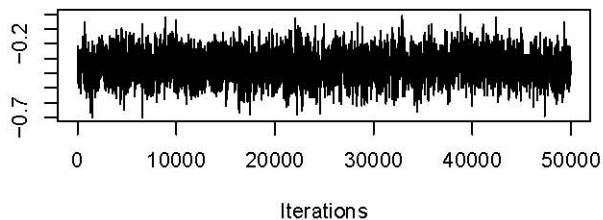**Density of x.2**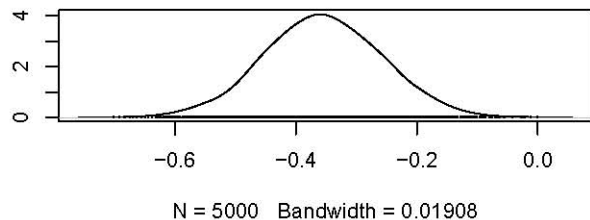**Trace of x.3**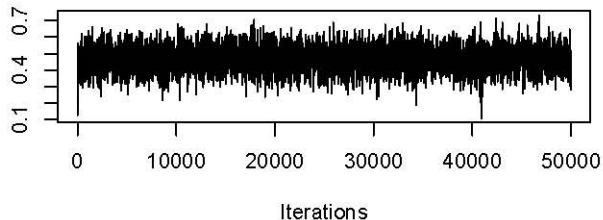**Density of x.3**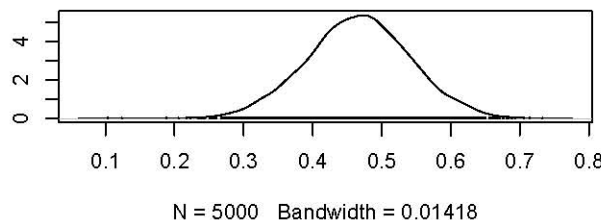**Trace of x.4**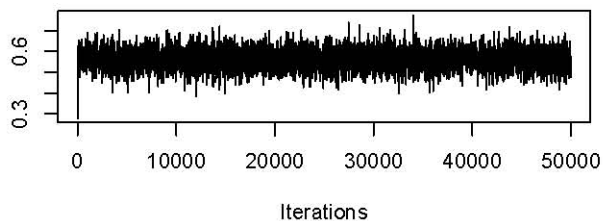**Density of x.4**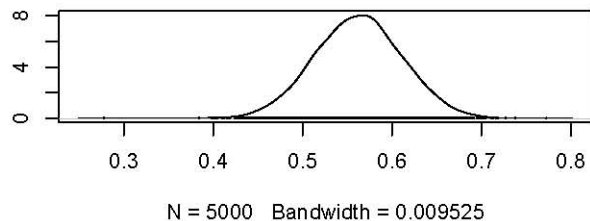

Supplement: MOESM2 [file 9434404]
